# Supplementary material for: Effects of the speed on the webbed foot kinematics of mallard (Anas platyrhynchos)
Source: PeerJ. 2023 May 15;11:e15362. doi: 10.7717/peerj.15362 (PMC10194065; doi:10.7717/peerj.15362)
Supplement: Supplemental Information 1 [file peerj-11-15362-s001.xlsx]

## Sheet: Figure 2
	speed of mallard (m/s)	stride length (m)	stance phase duration (s)	swing phase duration (s)	stride cycle (s)	duty factor
	0.33014	0.2585	0.592	0.191	0.783	0.756066
	0.523636	0.323083	0.434	0.183	0.617	0.703404
	0.582628	0.344333	0.408	0.183	0.591	0.690355
	0.763342	0.387778	0.333	0.175	0.508	0.655512
	0.855556	0.385	0.308	0.142	0.45	0.684444
	0.960675	0.415972	0.266	0.167	0.433	0.614319
	1.29244	0.484667	0.225	0.15	0.375	0.6
	1.37262	0.50375	0.217	0.15	0.367	0.591281
	2.13996	0.498611	0.125	0.108	0.233	0.536481
	0.297009	0.262556	0.725	0.159	0.884	0.820136
	0.451806	0.308583	0.566	0.117	0.683	0.828697
	0.631569	0.373889	0.434	0.158	0.592	0.733108
	0.72581	0.393389	0.409	0.133	0.542	0.754613
	0.8706	0.4205	0.35	0.133	0.483	0.724638
	1.19722	0.478889	0.267	0.133	0.4	0.6675
	1.24711	0.467667	0.242	0.133	0.375	0.645333
	1.3757	0.4925	0.2	0.158	0.358	0.558659
	1.52735	0.496389	0.183	0.142	0.325	0.563077
	0.504679	0.332583	0.509	0.15	0.659	0.772382
	0.555556	0.323889	0.442	0.141	0.583	0.758148
	0.847922	0.353583	0.292	0.125	0.417	0.70024
	1.0219	0.357667	0.242	0.108	0.35	0.691429
	0.931455	0.388417	0.284	0.133	0.417	0.681055
	1.24166	0.475556	0.233	0.15	0.383	0.608355
	1.21089	0.4335	0.233	0.125	0.358	0.650838
	1.44578	0.482889	0.2	0.134	0.334	0.598802
	0.319111	0.239333	0.634	0.116	0.75	0.845333
	0.476698	0.30175	0.508	0.125	0.633	0.802528
	0.641698	0.342667	0.392	0.142	0.534	0.734082
	0.70664	0.347667	0.35	0.142	0.492	0.711382
	0.883693	0.3685	0.284	0.133	0.417	0.681055
	1.11889	0.419583	0.233	0.142	0.375	0.621333
	1.21053	0.414	0.234	0.108	0.342	0.684211
	1.2676	0.43225	0.2	0.141	0.341	0.58651
	1.59889	0.479667	0.167	0.133	0.3	0.556667
	0.257778	0.206222	0.658	0.142	0.8	0.8225
	0.43381	0.303667	0.525	0.175	0.7	0.75
	0.591514	0.345444	0.425	0.159	0.584	0.72774
	0.745873	0.391583	0.358	0.167	0.525	0.681905
	0.940702	0.446833	0.3	0.175	0.475	0.631579
	1.03889	0.4675	0.292	0.158	0.45	0.648889
	1.13755	0.473222	0.25	0.166	0.416	0.600962
	1.37857	0.4825	0.2	0.15	0.35	0.571429
	1.52735	0.496389	0.166	0.159	0.325	0.510769
	0.296156	0.273944	0.759	0.166	0.925	0.820541
	0.451333	0.3385	0.583	0.167	0.75	0.777333
	0.579835	0.382111	0.475	0.184	0.659	0.720789
	0.776444	0.388222	0.308	0.192	0.5	0.616
	0.924431	0.4465	0.308	0.175	0.483	0.637681
	1.08733	0.453417	0.259	0.158	0.417	0.621103
	1.19274	0.467556	0.25	0.142	0.392	0.637755
	1.26907	0.46575	0.225	0.142	0.367	0.613079
	1.49966	0.487389	0.192	0.133	0.325	0.590769
	0.42387	0.353083	0.683	0.15	0.833	0.819928
	0.661855	0.336222	0.375	0.133	0.508	0.738189
	0.724932	0.356667	0.325	0.167	0.492	0.660569
	0.878788	0.425333	0.342	0.142	0.484	0.706612
	0.958365	0.414972	0.3	0.133	0.433	0.692841
	1.05719	0.431333	0.267	0.141	0.408	0.654412
	1.28911	0.4615	0.233	0.125	0.358	0.650838
	1.50566	0.502889	0.2	0.134	0.334	0.598802
	0.360855	0.234556	0.517	0.133	0.65	0.795385
	0.584087	0.258167	0.342	0.1	0.442	0.773756
	0.58513	0.316556	0.416	0.125	0.541	0.768946
	0.841503	0.371944	0.308	0.134	0.442	0.696833
	0.884142	0.382833	0.283	0.15	0.433	0.65358
	1.15356	0.432583	0.258	0.117	0.375	0.688
	1.09397	0.382889	0.233	0.117	0.35	0.665714
	1.26955	0.4545	0.233	0.125	0.358	0.650838
	1.58409	0.462556	0.175	0.117	0.292	0.599315
	0.332593	0.2245	0.558	0.117	0.675	0.826667
	0.445238	0.311667	0.534	0.166	0.7	0.762857
	0.62446	0.353444	0.383	0.183	0.566	0.676678
	0.800444	0.400222	0.341	0.159	0.5	0.682
	0.945333	0.472667	0.316	0.184	0.5	0.632
	1.00455	0.434972	0.275	0.158	0.433	0.635104
	1.22825	0.429889	0.217	0.133	0.35	0.62
	1.3347	0.4885	0.225	0.141	0.366	0.614754
	1.44461	0.492611	0.191	0.15	0.341	0.560117
	0.364971	0.267889	0.592	0.142	0.734	0.80654
	0.422316	0.299	0.575	0.133	0.708	0.812147
	0.579556	0.362222	0.5	0.125	0.625	0.8
	0.754482	0.402139	0.4	0.133	0.533	0.750469
	0.957317	0.471	0.325	0.167	0.492	0.660569
	1.06399	0.452194	0.283	0.142	0.425	0.665882
	1.26642	0.464778	0.217	0.15	0.367	0.591281
	1.4452	0.48125	0.191	0.142	0.333	0.573574
	1.57658	0.512389	0.192	0.133	0.325	0.590769
	0.464983	0.317583	0.558	0.125	0.683	0.816984
	0.600556	0.360333	0.475	0.125	0.6	0.791667
	0.754482	0.402139	0.375	0.158	0.533	0.703565
	0.927754	0.432333	0.291	0.175	0.466	0.624464
	1.12607	0.468444	0.266	0.15	0.416	0.639423
	1.21767	0.445667	0.241	0.125	0.366	0.65847
	1.33084	0.4445	0.209	0.125	0.334	0.625749
	1.53084	0.485278	0.192	0.125	0.317	0.605678
	0.413735	0.231278	0.45	0.109	0.559	0.805009
	0.478416	0.278917	0.492	0.091	0.583	0.843911
	0.664646	0.365556	0.391	0.159	0.55	0.710909
	0.828562	0.352139	0.292	0.133	0.425	0.687059
	0.958039	0.407167	0.275	0.15	0.425	0.647059
	1.10651	0.387278	0.225	0.125	0.35	0.642857
	1.16034	0.377111	0.192	0.133	0.325	0.590769
	1.39671	0.4665	0.2	0.134	0.334	0.598802
	1.5403	0.437444	0.184	0.1	0.284	0.647887

## Sheet: Figure 3
			speed of treadmill		average speed of mallard	test sequence												max	min	mean	s.d.	max-min
			km/h	m/s	m/s	1	2	3	4	5	6	7	8	9	10	11	12
	TMTPJ (°)	touch-down	1	0.277778	0.330261	173.476	168.686		166.989	169.163	161.201		154.006	160.575	165.315		160.899	173.476	154.006	164.479	5.87457	19.4706
			1.5	0.416667	0.471739	158.753	166.121	175.31	170.85	163.779	162.846	176.778	153.946	157.758	172.013	171.938	176.039	176.778	153.946	167.178	7.761	22.8315
			2	0.555556	0.60825	169.359	160.565	172.459	168.075	171.009	168.277	165.023	173.59	163.166	154.677	175.283	169.569	175.283	154.677	167.588	5.88193	20.6056
			2.5	0.694444	0.772536	159.601	166.557	170.685	166.608	169.554	161.278	147.658	168.817	170.421	167.874	164.964	174.018	174.018	147.658	165.67	6.94125	26.3604
			3	0.833333	0.920688	161.948	166.722	177.393	158.237	171.827	166.468	165.372	171.203	174.744	169.853	164.758	168.733	177.393	158.237	168.105	5.35799	19.1561
			3.5	0.972222	1.06229	148.813	163.088	147.934	150.101	168.001	140.773	119.959	174.285	155.955	171.857	156.979	155.203	174.285	119.959	154.412	14.8743	54.3259
			4	1.11111	1.19549	176.774	164.061	172.19	166.491	168.501	162.825	155.661	172.348	166.219	149.337	160.743	157.854	176.774	149.337	164.417	7.76674	27.4372
			4.5	1.25	1.32838	164.564	174.893	160.022	168.627	156.046	155.541	165.754	169.204	157.672	153.843	163.905	161.852	174.893	153.843	162.66	6.37812	21.0505
			5	1.38889	1.57676	161.955	162.254	163.03	174.46	161.083	172.478	175.503	142.688	160.265	163.702	156.95	175.779	175.779	142.688	164.179	9.47054	33.0917
		mid-stance	1	0.277778	0.330261	125.723	116.44		125.534	124.322	126.772		128.85	123.688	114.695		116.55	128.85	114.695	122.508	5.19525	14.1546
			1.5	0.416667	0.471739	122.517	139.678	137.959	120.453	121.569	113.182	131.225	121.746	114.234	118.576	127.078	150.109	150.109	113.182	126.527	11.1802	36.9268
			2	0.555556	0.60825	122.29	116.871	139.316	150.575	136.61	133.366	131.773	129.461	136.666	103.034	125.027	114.394	150.575	103.034	128.282	12.8091	47.5402
			2.5	0.694444	0.772536	132.451	111.54	125.165	164.556	125.142	134.432	152.004	123.777	116.818	126.742	152.323	146.549	164.556	111.54	134.292	16.1414	53.0164
			3	0.833333	0.920688	120.249	131.679	137.916	157.478	123.06	114.862	117.292	123.664	125.319	114.552	145.015	115.476	157.478	114.552	127.213	13.4784	42.9263
			3.5	0.972222	1.06229	132.11	123.559	142.4	130.769	134.205	124.231	120.791	121.907	133.679	108.813	139.639	140.921	142.4	108.813	129.419	9.87253	33.5876
			4	1.11111	1.19549	122.854	113.912	153.474	113.058	142.202	127.506	140.557	142.137	132.263	103.275	125.32	166.652	166.652	103.275	131.934	18.0946	63.3777
			4.5	1.25	1.32838	148.962	131.582	137.152	146.578	140.81	114.769	131.87	155.731	134.156	116.363	130.778	118.02	155.731	114.769	133.897	13.0297	40.9612
			5	1.38889	1.57676	127.257	120.045	154.869	154.334	137.961	112.796	143.968	136.57	133.627	116.484	134.943	154.668	154.869	112.796	135.627	14.6588	42.0731
		lift-off	1	0.277778	0.330261	155.444	131.712		154.696	144.484	128.653		164.576	149.408	140.877		136.891	164.576	128.653	145.194	11.8965	35.9231
			1.5	0.416667	0.471739	154.596	152.722	157.368	153.864	123.823	142.542	172.877	150.385	157.11	145.266	166.852	119.77	172.877	119.77	149.765	15.4692	53.1069
			2	0.555556	0.60825	136.435	148.742	116.058	117.934	138.885	159.996	149.22	143.672	135.595	145.273	146.09	151.946	159.996	116.058	140.821	13.0306	43.9379
			2.5	0.694444	0.772536	160.643	147.2	140.486	142.798	144.293	172.86	98.4199	162.87	158.728	147.138	134.37	125.144	172.86	98.4199	144.579	19.6299	74.44
			3	0.833333	0.920688	139.06	160.243	162.779	131.065	155.723	143.681	174.247	158.128	159.047	163.896	142.307	160.013	174.247	131.065	154.183	12.4226	43.1813
			3.5	0.972222	1.06229	145.758	155.306	160.893	117.676	164.033	140.046	167.98	91.8201	141.259	166.73	146.914	148.417	167.98	91.8201	145.569	22.0465	76.1595
			4	1.11111	1.19549	166.27	145.572	90.1463	135.523	134.983	168.076	97.7348	110.995	152.572	168.469	149.142	143.581	168.469	90.1463	138.589	26.4724	78.323
			4.5	1.25	1.32838	136.235	141.913	153.418	151.025	136.512	156.033	162.148	142.193	154.463	159.505	164.708	147.106	164.708	136.235	150.438	9.66295	28.4726
			5	1.38889	1.57676	157.035	159.827	146.724	151.569	169.611	167.194	164.65	142.831	164.262	172.722	162.572	145.976	172.722	142.831	158.748	9.91403	29.8906
	ITJ (°)	touch-down	1	0.277778	0.330261	145.68	143.829		158.612	142.36	157.039		152.529	160.458	153.181		157.328	160.458	142.36	152.335	6.79464	18.0981
			1.5	0.416667	0.471739	163.78	144.128	141.339	153.39	163.577	153.375	142.038	150.522	157.762	147.803	136.51	165.549	165.549	136.51	151.648	9.66019	29.039
			2	0.555556	0.60825	164.471	147.332	139.524	155.93	153.93	150.48	159.123	146.943	148.885	148.618	130.161	146.543	164.471	130.161	149.328	8.90842	34.3101
			2.5	0.694444	0.772536	166.602	161.419	141.528	151.933	161.717	161.754	131.059	149.836	167.111	157.109	157.773	153.872	167.111	131.059	155.143	10.5188	36.0516
			3	0.833333	0.920688	159.229	152.894	133.019	142.826	151.519	138.395	142.28	151.138	139.838	134.098	152.344	153.736	159.229	133.019	145.943	8.57767	26.2102
			3.5	0.972222	1.06229	125.463	144.664	147.234	153.421	149.181	161.265	150.221	154.185	174.845	157.812	152.363	140.651	174.845	125.463	150.942	11.8921	49.3817
			4	1.11111	1.19549	139.792	154.287	149.743	151.149	162.505	141.858	148.441	135.176	150.631	159.561	146.138	152.133	162.505	135.176	149.284	7.82731	27.3285
			4.5	1.25	1.32838	146.934	139.364	133.11	165.081	153.577	143.917	130.828	156.465	151.913	153.38	134.968	140.102	165.081	130.828	145.803	10.5402	34.2529
			5	1.38889	1.57676	150.68	155.828	142.033	152.995	173.167	160.094	138.257	136.738	164.888	149.347	146.268	140.872	173.167	136.738	150.931	11.1527	36.4288
		mid-stance	1	0.277778	0.330261	149.245	131.284		138.343	153.961	127.544		119.08	126.67	155.866		128.374	155.866	119.08	136.707	13.3178	36.786
			1.5	0.416667	0.471739	125.909	103.116	77.8158	88.8576	110.679	154.974	116.255	124.071	131.536	131.201	94.8571	99.0282	154.974	77.8158	113.192	21.7095	77.1585
			2	0.555556	0.60825	133.772	95.8866	96.924	111.4	146.549	126.377	93.4471	85.7015	139.589	128.23	112.974	123.86	146.549	85.7015	116.226	19.8845	60.8472
			2.5	0.694444	0.772536	128.553	77.4376	114.765	113.497	135.154	119.224	133.433	120.994	148.579	116.567	97.3865	103.698	148.579	77.4376	117.441	18.8129	71.1414
			3	0.833333	0.920688	109.821	107.685	122.584	95.6162	122.496	138.747	90.1891	97.5695	105.055	128.327	113.056	104.888	138.747	90.1891	111.336	14.3797	48.5578
			3.5	0.972222	1.06229	88.261	109.249	79.0416	113.492	98.2737	93.5005	82.5416	68.4274	100.922	128.604	107.004	103.17	128.604	68.4274	97.7072	16.5325	60.1769
			4	1.11111	1.19549	126.686	122.143	98.2316	96.4116	87.9358	104.765	99.5904	91.1813	119.482	120.286	121.246	92.9382	126.686	87.9358	106.741	14.1794	38.7504
			4.5	1.25	1.32838	126.394	115.776	120.319	101.568	133.136	118.294	85.2136	85.1265	102.979	112.3	112.614	109.913	133.136	85.1265	110.303	14.7005	48.0095
			5	1.38889	1.57676	138.334	104.265	98.9284	116.001	135.633	122.7	142.071	101.715	117.515	112.929	113.454	84.8574	142.071	84.8574	115.7	17.1334	57.2135
		lift-off	1	0.277778	0.330261	65.8117	53.1927		82.6701	57.832	50.267		68.9881	64.7833	51.8857		69.8149	82.6701	50.267	62.805	10.5387	32.4031
			1.5	0.416667	0.471739	86.9026	68.1519	79.5697	61.2865	97.0424	69.5594	92.6018	78.232	129.854	63.8078	105.362	70.9082	129.854	61.2865	83.6065	20.039	68.5671
			2	0.555556	0.60825	70.0004	64.2138	63.2149	53.8201	50.9664	79.6804	65.4738	64.9607	61.3053	110.266	95.6081	100.754	110.266	50.9664	73.3553	19.085	59.2995
			2.5	0.694444	0.772536	62.8052	87.1151	92.3898	82.5829	77.4915	124.485	50.0351	111.175	95.5382	102.912	77.6589	79.9652	124.485	50.0351	87.0128	20.3228	74.4501
			3	0.833333	0.920688	67.3536	86.149	105.442	59.9397	63.4008	90.8499	86.4457	121.552	92.0974	112.356	100.743	93.7747	121.552	59.9397	90.0087	19.1169	61.6123
			3.5	0.972222	1.06229	86.5374	74.7058	59.4653	67.4073	98.261	74.8948	95.2779	44.44	84.6929	111.84	108.488	94.9639	111.84	44.44	83.4145	20.0904	67.4
			4	1.11111	1.19549	103.003	88.5025	54.8009	96.0214	65.1928	120.826	55.6024	60.6997	111.824	101.173	96.0245	54.6216	120.826	54.6216	84.0243	24.3356	66.204
			4.5	1.25	1.32838	72.556	99.3133	119.677	64.7145	69.7128	86.0436	110.505	89.7168	103.872	95.1532	123.332	89.5383	123.332	64.7145	93.6779	18.894	58.6179
			5	1.38889	1.57676	121.036	76.3512	93.9902	105.224	94.4775	121.282	102.724	100.405	111.284	108.93	122.074	119.653	122.074	76.3512	106.453	13.9387	45.7228

## Sheet: Figure 4
		speed of mallard(m/s)	0.330261	0.471739	＜0.47	0.60825	0.772536	0.61-0.77	0.920688	1.06229	0.92-1.06	1.19549	1.32838	1.20-1.33	＞1.53
		duty factor	0.810908	0.788661	0.799784	0.737551	0.691679	0.714615	0.664592	0.651526	0.658059	0.629772	0.607196	0.618484	0.579928
	TMTPJ (°)	0	164.479	167.178	165.828	167.588	165.67	166.629	168.105	154.412	161.259	164.417	162.66	163.539	164.381
		0.1	149.114	158.961	154.037	160.59	156.545	158.567	161.699	161.467	161.583	161.326	156.739	159.032	159.124
		0.2	137.278	148.19	142.734	147.14	146.55	146.845	148.973	155.944	152.458	154.341	146.961	150.651	147.852
		0.3	132.894	135.889	134.392	137.079	141.208	139.144	131.978	136.856	134.417	139.015	134.83	136.922	134.583
		0.4	120.966	126.817	123.892	127.572	125.286	126.429	128.202	124.055	126.128	132.26	128.599	130.429	127.757
		0.5	115.046	125.84	120.443	127.545	129.539	128.542	130.655	135.799	133.227	141.048	143.177	142.112	150.246
		0.6	119.578	129.387	124.482	138.868	142.662	140.765	152.205	149.828	151.016	148.889	149.09	148.99	145.837
		0.7	134.63	144.633	139.631	147.616	134.835	141.226	125.677	127.207	126.442	122.541	119.509	121.025	123.312
		0.8	153.49	140.611	147.05	125.652	132.692	129.172	134.114	136.831	135.472	135.178	138.27	136.724	146.602
		0.9	149.722	148.978	149.35	160.161	160.586	160.374	158.93	163.068	160.999	161.208	161.544	161.376	162.289
		1	167.81	167.811	167.811	162.803	165.497	164.15	162.548	161.579	162.063	163.173	165.897	164.535	164.456
	ITJ (°)	0	152.335	151.648	151.992	149.328	155.143	152.236	145.943	150.942	148.442	149.284	145.803	147.544	150.953
		0.1	143.639	133.295	138.467	137.824	139.862	138.843	128.762	130.943	129.852	124.552	136.271	130.411	122.224
		0.2	142.357	128.336	135.347	129.754	132.947	131.351	119.238	118.421	118.829	118.371	112.242	115.306	116.24
		0.3	142.207	123.43	132.819	122.684	125.573	124.128	113.664	100.041	106.853	106.787	110.426	108.607	115.021
		0.4	140.079	111.895	125.987	110.594	112.418	111.506	105.741	102.017	103.879	106.966	112.995	109.98	109.66
		0.5	128.59	95.5027	112.046	100.948	108.271	104.609	109.85	111.749	110.8	110.072	111.77	110.921	118.195
		0.6	111.235	102.669	106.952	108.348	107.13	107.739	106.201	110.579	108.39	96.4822	98.0372	97.2597	95.7463
		0.7	108.024	102.15	105.087	90.0609	82.633	86.347	68.7406	63.4201	66.0804	60.1631	58.6356	59.3993	61.2179
		0.8	75.2893	74.2018	74.7456	51.7676	64.1718	57.9697	59.3232	55.7319	57.5276	72.9812	62.3971	67.6892	66.7293
		0.9	81.7233	76.3333	79.0283	101.191	113.856	107.523	113.58	117.826	115.703	104.574	116.553	110.564	104.912
		1	146.193	150.722	148.458	152.249	147.479	149.864	152.609	152.144	152.376	142.104	147.632	144.868	144.601
	α (°)	0	41.3378	40.0797	40.7088	38.2549	39.205	38.73	39.205	41.0953	40.1502	40.8879	38.5944	39.7411	40.2064
		0.1	41.9243	39.4397	40.682	41.6784	42.9626	42.3205	40.9551	39.8869	40.421	39.8226	40.3225	40.0726	38.19
		0.2	43.0925	41.519	42.3058	42.5374	39.0986	40.818	39.7666	40.5686	40.1676	39.7126	40.2143	39.9635	37.3345
		0.3	40.2857	40.3092	40.2974	39.5199	38.5627	39.0413	43.5192	42.2766	42.8979	43.6153	39.6852	41.6503	40.8101
		0.4	41.1949	37.7558	39.4753	43.4503	42.4306	42.9404	39.144	42.1228	40.6334	37.6664	36.1073	36.8869	39.2061
		0.5	40.7368	38.1517	39.4443	38.2102	36.857	37.5336	33.2361	37.2629	35.2495	29.0102	28.4376	28.7239	27.1097
		0.6	35.7137	30.8994	33.3066	31.4517	28.0485	29.7501	30.0094	22.9622	26.4858	18.9467	14.4831	16.7149	11.1444
		0.7	21.5	18.1445	19.8222	13.8414	12.4987	13.1701	9.77272	9.16685	9.46978	10.1059	8.49663	9.30129	9.50021
		0.8	14.4181	15.7583	15.0882	8.01736	11.6221	9.81974	8.6338	10.4484	9.54112	7.77019	11.3292	9.54969	9.99779
		0.9	11.0836	12.19	11.6368	11.9538	16.7779	14.3659	20.739	28.231	24.485	25.874	17.1446	21.5093	26.4422
		1	31.5293	33.6288	32.5791	38.6903	38.6718	38.6811	39.6396	40.4408	40.0402	34.9819	39.279	37.1304	37.1931
	β (°)	0	32.3091	29.5477	30.9284	34.3733	38.2245	36.2989	34.7313	34.395	34.5631	30.5245	35.2405	32.8825	36.7058
		0.1	36.1658	37.53	36.8479	38.6743	39.1727	38.9235	37.9464	38.3443	38.1453	40.9499	37.1279	39.0389	43.9921
		0.2	36.1629	35.137	35.65	38.8522	37.82	38.3361	39.4885	42.532	41.0102	39.9565	40.5678	40.2621	40.619
		0.3	38.1529	35.0286	36.5907	39.5629	36.9843	38.2736	38.5204	42.082	40.3012	39.8855	43.3095	41.5975	42.8595
		0.4	39.3255	36.3693	37.8474	39.7539	39.4949	39.6244	41.5894	39.3976	40.4935	39.6418	38.1614	38.9016	37.1953
		0.5	40.1677	37.467	38.8173	39.9328	39.1754	39.5541	38.019	39.1639	38.5914	38.0642	36.5314	37.2978	32.7381
		0.6	40.8358	42.5063	41.6711	35.8899	36.1237	36.0068	26.8354	31.6625	29.2489	27.307	20.3702	23.8386	15.465
		0.7	39.8023	32.6367	36.2195	26.752	15.4741	21.1131	10.0626	7.42827	8.74545	12.3142	9.39883	10.8565	11.6799
		0.8	13.0115	13.2497	13.1306	11.2491	10.5249	10.887	9.5002	19.101	14.3006	15.027	13.9854	14.5062	11.5494
		0.9	11.4287	13.5336	12.4811	19.4015	17.607	18.5042	16.653	20.7399	18.6964	24.0222	22.1126	23.0674	21.0953
		1	33.3411	31.2736	32.3074	33.4376	31.853	32.6453	34.6443	30.3974	32.5209	32.3942	32.0711	32.2326	34.7556

## Sheet: Figure 5
			marker point
		stride cycle	1	2	3	4	5	6	7	8	9	10	11	12
	vertical displacement (m)	0	-0.0334874	-0.0317344	-0.0217126	-0.0371372	-0.0371761	-0.0338156	-0.0229604	-0.038629	-0.0380721	-0.0374396	-0.0356871	-0.0260503
		0.1	-0.0397522	-0.0385612	-0.0314872	-0.0388672	-0.03895	-0.038456	-0.0317662	-0.0401717	-0.0398529	-0.0393707	-0.0384311	-0.0346551
		0.2	-0.0391793	-0.037481	-0.030365	-0.0380344	-0.0394065	-0.0376953	-0.0309979	-0.0394323	-0.0396401	-0.0393709	-0.0388335	-0.0337381
		0.3	-0.0386056	-0.0364809	-0.0276655	-0.0392873	-0.0393554	-0.0368975	-0.0293598	-0.0399998	-0.0399925	-0.0391918	-0.0375737	-0.0309521
		0.4	-0.0378726	-0.0321176	-0.0217005	-0.0393255	-0.0398327	-0.0358172	-0.0243228	-0.0394971	-0.0399454	-0.039487	-0.0363653	-0.0258577
		0.5	-0.0330854	-0.0237717	-0.0137107	-0.0390142	-0.038413	-0.0326666	-0.0172931	-0.0407751	-0.0397173	-0.0370363	-0.0316899	-0.0175724
		0.6	-0.0235286	-0.0115283	0.0018	-0.0378678	-0.0332401	-0.0211537	-0.00045529	-0.037139	-0.0345744	-0.0274009	-0.0163911	0.00181689
		0.7	-0.0134602	0.00230674	0.0147286	-0.0304401	-0.0169624	-0.00347138	0.0148525	-0.0268887	-0.01811	-0.00866357	0.00177713	0.0156361
		0.8	0.000617511	0.0140093	0.02597	-0.0111846	-0.000727472	0.0101948	0.0254355	-0.0109968	-0.00378158	0.00337574	0.0112705	0.0228724
		0.9	0.00432033	0.00836783	0.017856	0.0040444	0.00731044	0.0106087	0.017037	-0.00294657	-0.000468232	0.0024747	0.00642836	0.0136169
		1	-0.0346823	-0.0329036	-0.0225607	-0.0367771	-0.0364976	-0.0340107	-0.0233125	-0.0386269	-0.0375443	-0.0363574	-0.033316	-0.0243645

## Sheet: Figure 6
	Fig.6(A)			Fig.6(B)								Fig.6(C)
	Speed of mallard(m/s)	%Congruity		Time(s)	CoM Z(m)	CoM VX(m/s)	CoM VY(m/s)	CoM VZ(m/s)	Ep+Ekv(J)	Ekh(J)		Time(s)	CoM Z(m)	CoM VX(m/s)	CoM VY(m/s)	CoM VZ(m/s)	Ep+Ekv(J)	Ekh(J)
	0.25778	0.46875		0	0.10086	0.137842	0.373579	-0.48654	1.32936	0.5232		0	0.114031	0.239855	0.366008	-0.30402	1.39783	1.34168
	0.29616	0.43243		0.00833	0.0971033	0.126264	0.325931	-0.42932	1.25369	0.46992		0.00833	0.111713	0.206577	0.274189	-0.306057	1.37128	1.17519
	0.31911	0.33333		0.01667	0.0932665	0.114686	0.278284	-0.372101	1.18101	0.41952		0.01667	0.109108	0.173298	0.18237	-0.308093	1.34137	1.02015
	0.33014	0.46316		0.025	0.0897652	0.111775	0.23562	-0.2671	1.09952	0.37782		0.025	0.10613	0.150957	0.108585	-0.247674	1.28617	0.90464
	0.36497	0.23864		0.03333	0.0875291	0.109147	0.174806	-0.11911	1.0389	0.32235		0.03333	0.103669	0.115499	-0.00443552	-0.162381	1.23621	0.74137
	0.41373	0.46269		0.04167	0.0872752	0.110416	0.121244	0.0382105	1.02828	0.27766		0.04167	0.102492	0.085575	-0.102912	-0.0467454	1.20784	0.61293
	0.42232	0.42353		0.05	0.0889636	0.112789	0.0835496	0.170516	1.06472	0.24846		0.05	0.103005	0.0672039	-0.170817	0.0717485	1.21567	0.53195
	0.43381	0.47619		0.05833	0.091603	0.112476	0.0643605	0.250439	1.11598	0.23405		0.05833	0.104652	0.0584048	-0.209519	0.1623	1.24777	0.48857
	0.44524	0.42857		0.06667	0.0942821	0.105852	0.0578552	0.270816	1.15389	0.22842		0.06667	0.106721	0.0602815	-0.218187	0.208852	1.28249	0.47938
	0.45133	0.46667		0.075	0.0965378	0.093919	0.0564989	0.249327	1.17374	0.226		0.075	0.108698	0.0711769	-0.203371	0.212456	1.30668	0.49622
	0.46498	0.46341		0.08333	0.0983608	0.0806123	0.0535861	0.213866	1.18535	0.22249		0.08333	0.110414	0.0889856	-0.173678	0.190011	1.32145	0.53077
	0.47842	0.46269		0.09167	0.0998865	0.0689977	0.0462216	0.182263	1.1958	0.21614		0.09167	0.111924	0.105897	-0.141285	0.158665	1.33267	0.56977
	0.50468	0.4557		0.1	0.101246	0.0599533	0.0348568	0.161232	1.20746	0.20739		0.1	0.11308	0.119571	-0.106334	0.131046	1.34148	0.61299
	0.52364	0.39189		0.10833	0.102492	0.0528723	0.0230986	0.149048	1.21986	0.19874		0.10833	0.113994	0.126839	-0.0706797	0.110301	1.34924	0.65776
	0.55556	0.42857		0.11667	0.103646	0.0466901	0.0126609	0.142919	1.23237	0.19126		0.11667	0.11468	0.123698	-0.0431923	0.0959023	1.35554	0.69203
	0.57956	0.41333		0.125	0.104807	0.0392613	0.00384748	0.137829	1.24519	0.18497		0.125	0.115439	0.109553	-0.0253647	0.0895526	1.36376	0.71306
	0.58409	0.26415		0.13333	0.105941	0.0289065	-0.00338942	0.131122	1.25745	0.17977		0.13333	0.116181	0.0906074	-0.00876066	0.0919124	1.37275	0.73256
	0.59151	0.41429		0.14167	0.10712	0.0179321	-0.00689357	0.121779	1.26991	0.17717		0.14167	0.116924	0.0708288	0.008472	0.0998608	1.38242	0.7536
	0.60056	0.18056		0.15	0.108085	0.0055179	-0.00983566	0.109569	1.27957	0.17508		0.15	0.117727	0.0522935	0.0252371	0.111304	1.39331	0.7749
	0.62446	0.42647		0.15833	0.108945	-0.00717431	-0.0125504	0.0963046	1.28807	0.17334		0.15833	0.118686	0.0312522	0.0418796	0.126375	1.40676	0.79668
	0.63157	0.22535		0.16667	0.10962	-0.0203699	-0.0151953	0.0831874	1.2946	0.17186		0.16667	0.119808	0.00595868	0.0616811	0.146197	1.4232	0.82372
	0.6417	0.46875		0.175	0.110244	-0.0313655	-0.0150472	0.0724022	1.30094	0.17229		0.175	0.121139	-0.0138044	0.095443	0.168054	1.44299	0.87197
	0.66185	0.39344		0.18333	0.110845	-0.042496	-0.0159684	0.0628543	1.30724	0.1722		0.18333	0.122555	-0.0321421	0.130999	0.178721	1.46188	0.92467
	0.70664	0.44068		0.19167	0.111319	-0.0517219	-0.0182968	0.0555003	1.31229	0.17123		0.19167	0.124288	-0.0594205	0.145636	0.162701	1.479	0.94809
	0.72581	0.58462		0.2	0.111764	-0.0584879	-0.0213972	0.0481038	1.31708	0.16971		0.2	0.125969	-0.0860637	0.137863	0.113293	1.49061	0.93874
	0.74587	0.34921		0.20833	0.112064	-0.0647753	-0.0254431	0.03947	1.32015	0.16761		0.20833	0.127064	-0.0740534	0.13027	0.0321154	1.49642	0.92625
	0.75448	0.53125		0.21667	0.112426	-0.0708914	-0.0293779	0.0303385	1.32403	0.16564		0.21667	0.126996	-0.0141072	0.128058	-0.0721588	1.49812	0.91979
	0.76334	0.42623		0.225	0.112658	-0.0760323	-0.0323743	0.0209685	1.32648	0.16423		0.225	0.125716	0.0679606	0.127201	-0.174132	1.49812	0.92117
	0.77644	0.46667		0.23333	0.112787	-0.0803473	-0.03093	0.0104008	1.32779	0.16553		0.23333	0.123515	0.132675	0.122218	-0.243008	1.48945	0.92158
	0.80044	0.4		0.24167	0.112818	-0.0873387	-0.0261813	-0.001904	1.3281	0.16921		0.24167	0.120772	0.170573	0.121709	-0.257325	1.46146	0.92772
	0.8415	0.62264		0.25	0.112742	-0.0948542	-0.017817	-0.0135887	1.32731	0.17533		0.25	0.118189	0.170646	0.112623	-0.222806	1.4211	0.91436
	0.84792	0.3		0.25833	0.112596	-0.10297	-0.00842005	-0.0230627	1.3258	0.18235		0.25833	0.116326	0.132705	0.0915807	-0.154659	1.38374	0.87684
	0.85556	0.57407		0.26667	0.112337	-0.111188	0.00115871	-0.0288545	1.32293	0.18968		0.26667	0.115597	0.0885216	0.0782928	-0.0700293	1.36375	0.85193
	0.8706	0.58621		0.275	0.112006	-0.122209	0.00942051	-0.030302	1.31908	0.19673		0.275	0.115527	0.0726995	0.0872527	0.0108312	1.36005	0.86322
	0.87879	0.5		0.28333	0.111727	-0.135234	0.0157779	-0.0267538	1.31568	0.20304		0.28333	0.116096	0.0930259	0.115673	0.0720098	1.36979	0.90656
	0.88414	0.59615		0.29167	0.111488	-0.149855	0.0218487	-0.0188645	1.31265	0.20968		0.29167	0.116987	0.121956	0.148769	0.108462	1.38423	0.95962
	0.92443	0.60345		0.3	0.111391	-0.163977	0.0300807	-0.00822447	1.31134	0.21803		0.3	0.11818	0.14247	0.182704	0.125837	1.40071	1.01483
	0.92775	0.48214		0.30833	0.11137	-0.176024	0.0418991	-0.00061072	1.31105	0.2288		0.30833	0.119421	0.154841	0.218669	0.126984	1.4155	1.0736
	0.93145	0.56		0.31667	0.111432	-0.184604	0.0595182	-0.00153661	1.31177	0.24335		0.31667	0.120473	0.167883	0.257748	0.111541	1.42567	1.13935
	0.9407	0.5614		0.325	0.111574	-0.190201	0.083403	-0.0158928	1.3136	0.26243		0.325	0.121405	0.181278	0.296904	0.0790326	1.43293	1.20734
	0.94533	0.58333		0.33333	0.111475	-0.188171	0.114708	-0.038265	1.31317	0.28635		0.33333	0.12203	0.19763	0.335589	0.0365748	1.43734	1.27727
	0.95732	0.76271		0.34167	0.111109	-0.176839	0.148593	-0.0607435	1.31018	0.31158		0.34167	0.122207	0.210842	0.361572	-0.014617	1.43875	1.32599
	0.95804	0.5098		0.35	0.110224	-0.156742	0.181406	-0.070456	1.30054	0.33571		0.35	0.121833	0.213416	0.364393	-0.0746292	1.43756	1.33163
	0.95837	0.59615		0.35833	0.109395	-0.133421	0.207043	-0.0602031	1.28997	0.35455		0.35833	0.120986	0.204987	0.347739	-0.140111	1.43602	1.30021
	1.00455	0.59615		0.36667	0.108715	-0.108534	0.221306	-0.029573	1.28032	0.36402		0.36667	0.119562	0.200423	0.33814	-0.176896	1.42626	1.28237
	1.0219	0.61905		0.375	0.108725	-0.0824609	0.221735	0.0158525	1.28007	0.36142		0.375	0.117617	0.179481	0.309075	-0.229328	1.41614	1.22759
	1.03889	0.61111		0.38333	0.109111	-0.0562143	0.210837	0.0661492	1.28708	0.34922		0.38333	0.115222	0.158539	0.28001	-0.28176	1.40403	1.17436
	1.05719	0.5102		0.39167	0.109954	-0.0313106	0.190594	0.111512	1.30183	0.32968
	1.06399	0.54902		0.4	0.111055	-0.00782013	0.162746	0.14519	1.31998	0.30484
	1.08733	0.57692		0.40833	0.112507	0.0150376	0.13296	0.17035	1.34185	0.28
	1.09397	0.57143		0.41667	0.114082	0.0345796	0.104737	0.188306	1.36425	0.25793
	1.10651	0.54762		0.425	0.115734	0.0477603	0.0806767	0.197444	1.38581	0.24002
	1.11889	0.66667		0.43333	0.117421	0.0542462	0.0606936	0.195033	1.4051	0.22553
	1.12607	0.72		0.44167	0.119155	0.0595385	0.0479183	0.183848	1.42298	0.21663
	1.16034	0.66667		0.45	0.120709	0.0659639	0.0413003	0.164096	1.43714	0.21239
	1.19722	0.625		0.45833	0.122008	0.0738808	0.0404829	0.134961	1.4472	0.21248
	1.21767	0.63636		0.46667	0.123008	0.0804213	0.0422364	0.0995819	1.45401	0.21433
	1.24166	0.76087		0.475	0.123698	0.085572	0.0460181	0.0639684	1.45863	0.21754
	1.24711	0.64444		0.48333	0.124043	0.0895375	0.0496554	0.0307764	1.4608	0.22056
	1.2676	0.5122		0.49167	0.12411	0.091742	0.0533095	0.00081681	1.46103	0.22344
	1.26907	0.63636		0.5	0.123967	0.0919217	0.0568908	-0.0245869	1.4597	0.22606
	1.28911	0.67442		0.50833	0.123659	0.0922865	0.0597635	-0.045665	1.45697	0.2282
	1.29244	0.58696		0.51667	0.123175	0.0950855	0.0626358	-0.0668218	1.4527	0.23062
	1.3347	0.70455		0.525	0.12257	0.101041	0.0669828	-0.0908504	1.44785	0.23453
	1.37857	0.54762		0.53333	0.12178	0.10844	0.0754875	-0.117439	1.44186	0.2418
	1.39671	0.525		0.54167	0.120695	0.114274	0.086593	-0.145362	1.4335	0.25099
	1.44578	0.625		0.55	0.119327	0.11721	0.101727	-0.172882	1.42265	0.26309
	1.49966	0.55263		0.55833	0.117704	0.118497	0.12265	-0.198398	1.40922	0.2799
	1.50566	0.525		0.56667	0.115934	0.119787	0.149618	-0.221641	1.39424	0.30229
	1.52735	0.73684		0.575	0.114036	0.117332	0.164713	-0.232664	1.37491	0.31475
	1.5403	0.55882		0.58333	0.111948	0.120272	0.189264	-0.24832	1.35485	0.33659
	1.57658	0.53846		0.59167	0.109732	0.123212	0.213814	-0.263976	1.33358	0.35916
